# Supplementary material for: MoS2-based sensor for the detection of miRNA in serum samples related to breast cancer
Source: Royal Society of Chemistry journal article supplement (doi:10.1039/c7ay02329d), 2017-12-04
Supplement: c7ay02329d1.pdf [file c7ay02329d1.pdf]

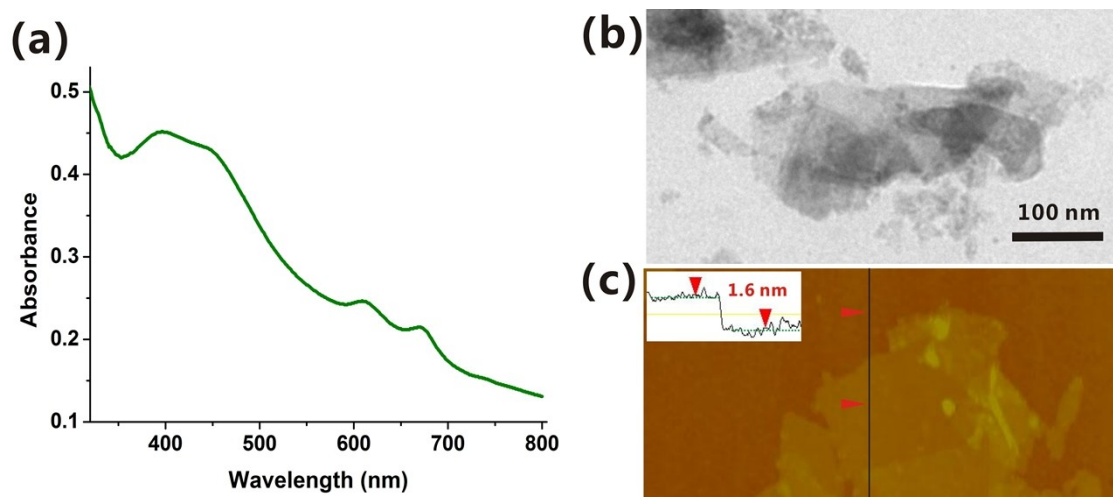

**Fig. S1** (a) Typical UV-visible adsorption spectrum of the MoS<sub>2</sub> nanosheets. (b) TEM image of the MoS<sub>2</sub> nanosheets. (c) AFM and height profile (inset) images of the MoS<sub>2</sub> nanosheets.
